# Supplementary material
Source: PubMed Central journal article supplement (PMC6460709)
Supplement: 41433_2018_239_MOESM1_ESM.pdf [file 41433_2018_239_MOESM1_ESM.pdf]

# Incidence of Submacular Haemorrhage in Scotland

In association with the Scottish Ophthalmological Surveillance Unit

## Case definition

**Inclusion criteria:** Any patient presenting with acute SMH involving fovea of >2 disc diameters in size in greatest linear diameter.

**Exclusion criteria:** Trauma

## Patient Details

Hospital Number \_\_\_\_\_

Month and Year of Birth (mm/yyyy) \_\_\_\_\_

First half of post code \_\_\_\_\_

Gender:  Male  Female

Ethnic Origin (please tick most relevant box)

| White                                                                                                                 | Asian or Asian British                                                                                                                                           | Black or Black British                                                                                                    | Chinese                                                                             | Mixed Race                                                                                                                                                                                      | Other ethnic group                              |
|-----------------------------------------------------------------------------------------------------------------------|------------------------------------------------------------------------------------------------------------------------------------------------------------------|---------------------------------------------------------------------------------------------------------------------------|-------------------------------------------------------------------------------------|-------------------------------------------------------------------------------------------------------------------------------------------------------------------------------------------------|-------------------------------------------------|
| <input type="checkbox"/> British<br><input type="checkbox"/> Irish<br><input type="checkbox"/> Other (please specify) | <input type="checkbox"/> Indian<br><input type="checkbox"/> Pakistani<br><input type="checkbox"/> Bangladeshi<br><input type="checkbox"/> Other (please specify) | <input type="checkbox"/> Caribbean<br><input type="checkbox"/> African<br><input type="checkbox"/> Other (please specify) | <input type="checkbox"/> Chinese<br><input type="checkbox"/> Other (please specify) | <input type="checkbox"/> White & Black Caribbean<br><input type="checkbox"/> White & Black African<br><input type="checkbox"/> White & Asian<br><input type="checkbox"/> Other (please specify) | <input type="checkbox"/> Other (please specify) |

## Clinical Features at presentation:

1. Date of diagnosis: (dd/mm/yyyy): [    /    /    ]

2. Visual Acuity at presentation: Right eye \_\_\_\_\_ Left eye \_\_\_\_\_

logmar       snellen       other (please specify \_\_\_\_\_)

3. Affected eye:     Right eye       Left eye

4. Duration of symptoms (days):     1-7       8-14       >14       Not known

5. Previous treatment for SMH:

- None
- Intravitreal AntiVEGF
- Subretinal AntiVEGF
- Gas [ type:  SF6  C2F6  C3F8 ] [volume (%): \_\_\_\_\_ ]
- Intravitreal TPA
- Subretinal TPA
- Vitrectomy
- Not known

6. Size of haemorrhage (in approximate disc diameters):  2-6  7-11  12-16  >16

7. Pre-bleed visual acuity: Right eye \_\_\_\_\_ Left eye \_\_\_\_\_  
 logmar  snellen  other (please specify \_\_\_\_\_)

8. Past history of Wet AMD

|                                   | Right Eye                | Left Eye                 |
|-----------------------------------|--------------------------|--------------------------|
| None                              | <input type="checkbox"/> | <input type="checkbox"/> |
| Classic CNV                       | <input type="checkbox"/> | <input type="checkbox"/> |
| Occult CNV                        | <input type="checkbox"/> | <input type="checkbox"/> |
| Mixed classic/occult CNV          | <input type="checkbox"/> | <input type="checkbox"/> |
| Retinal angiomatous proliferation | <input type="checkbox"/> | <input type="checkbox"/> |
| Polypoidal choroidal vasculopathy | <input type="checkbox"/> | <input type="checkbox"/> |
| Not known                         | <input type="checkbox"/> | <input type="checkbox"/> |

9. Previous Intravitreal injections

|             | Right Eye                                     | Left Eye |
|-------------|-----------------------------------------------|----------|
|             | <i>(Please indicate number of injections)</i> |          |
| Lucentis    | _____                                         | _____    |
| Avastin     | _____                                         | _____    |
| Aflibercept | _____                                         | _____    |

10. Co-morbidity and Previous eye operations:

|                        | Right Eye                | Left Eye                 |
|------------------------|--------------------------|--------------------------|
| Dry AMD                | <input type="checkbox"/> | <input type="checkbox"/> |
| Amblyopia              | <input type="checkbox"/> | <input type="checkbox"/> |
| Cataract surgery       | <input type="checkbox"/> | <input type="checkbox"/> |
| Vitrectomy             | <input type="checkbox"/> | <input type="checkbox"/> |
| Trabeculectomy         | <input type="checkbox"/> | <input type="checkbox"/> |
| Other (Please specify) | _____                    | _____                    |

## **Initial Treatment**

11. Initial date of treatment (dd/mm/yyyy):

12. Initial Treatment plan: *(Please tick all appropriate boxes)*

Observation

Intravitreal AntiVEGF (no. of injections:     1     2     3     >3)

Subretinal AntiVEGF (no. of injections:     1     2     3     >3)

Type of injection: ( lucentis  avastin  Aflibercept  other \_\_\_\_\_)

Gas            (Type:  SF6             C2F6             C3F8;            volume (%): \_\_\_\_\_)

Intravitreal TPA            (Amount mcgs: \_\_\_\_\_)

Subretinal TPA            (Amount mcgs: \_\_\_\_\_)

Vitrectomy (Post op positioning:     prone             semi-prone

other \_\_\_\_\_)

## **Patient Status**

13. Was the patient transferred from another unit?

No             Yes (Please Specify) \_\_\_\_\_

*(NB: We will not contact other clinicians directly, this is to check for duplicate reporting)*

14. Was the patient transferred to another unit?

No             Yes (Please Specify) \_\_\_\_\_

*(NB: We will not contact other clinicians directly, this is to check for duplicate reporting)*

## **Details of person completing the form**

Name: \_\_\_\_\_

Designation:

Email:

Thank you for completing this questionnaire for this SOSU approved study.  
Please return it in the prepaid envelope to.

Mr Gerry McGowan,  
VR fellow,  
Tennent Institute of Ophthalmology,  
Glasgow

A follow-up questionnaire will be sent to you in 6 months time.

Thank You:

# Incidence of submacular haemorrhage (SMH) in Scotland

## Follow up questionnaire:

### Patient Details

Hospital Number \_\_\_\_\_

Month and Year of Birth (mm/yyyy) \_\_\_\_\_

First half of post code \_\_\_\_\_

This questionnaire refers to information from the latest follow-up appointment.

1. Date of most recent Follow-up appointment \_\_\_\_\_

### Treatment

2. Subsequent Treatment: *(Please tick all appropriate boxes)*

*(Please tick all appropriate boxes)*

|                       | Initial treatment reported in previous questionnaire | Subsequent Treatment     |                                      |
|-----------------------|------------------------------------------------------|--------------------------|--------------------------------------|
| Observation           | <input type="checkbox"/>                             | <input type="checkbox"/> |                                      |
| Intravitreal AntiVEGF | <input type="checkbox"/>                             | <input type="checkbox"/> | No. of injections                    |
| Subretinal AntiVEGF   | <input type="checkbox"/>                             | <input type="checkbox"/> | _____                                |
|                       |                                                      |                          | <input type="checkbox"/> Lucentis    |
|                       |                                                      |                          | <input type="checkbox"/> Avastin     |
|                       |                                                      |                          | <input type="checkbox"/> Aflibercept |
|                       |                                                      |                          | <input type="checkbox"/> Other _____ |
| Gas                   | <input type="checkbox"/>                             | <input type="checkbox"/> | <input type="checkbox"/> SF6         |
|                       |                                                      |                          | <input type="checkbox"/> C2F6        |
|                       |                                                      |                          | <input type="checkbox"/> C3F8        |
|                       |                                                      |                          | volume (%): _____                    |
| Intravitreal TPA      | <input type="checkbox"/>                             | <input type="checkbox"/> | Amount mcgs: _____                   |
| Subretinal TPA        | <input type="checkbox"/>                             | <input type="checkbox"/> | Amount mcgs: _____                   |
| Vitrectomy            | <input type="checkbox"/>                             | <input type="checkbox"/> |                                      |

SOSU study number: \_\_\_\_\_
